# Supplementary material for: A regional-scale ecological risk framework for environmental flow evaluations
Source: Copernicus journal article supplement (doi:10.5194/hess-22-957-2018), 2018-02-02
Supplement: Supplementary file 1 [file hess-22-957-2018-supplement.zip]

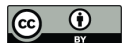

## *Supplement of*

# **A regional-scale ecological risk framework for environmental flow evaluations**

**Gordon C. O'Brien et al.**

*Correspondence to:* Gordon C. O'Brien (obrieng@ukzn.ac.za)

- hess-22-957-2018-supplement-title-page.pdf
- 2017-10-24 O'Brien et al PROBFLO MS V3 Supplementry tables.docx
- O'Brien et al Mara Netica BN.neta
- O'Brien et al Senqu Netica BN.neta

The copyright of individual parts of the supplement might differ from the CC BY 3.0 License.
